# Supplementary material for: Cancer Risk in Women Treated with Fertility Drugs According to Parity Status—A Registry-based Cohort Study
Source: Oxford University Press journal article supplement (doi:10.1158/1055-9965.epi-16-0809), 2017-01-20
Supplement: 10559965epi160809-sup-172961_1_supp_3766818_2hk56m.docx [file 10559965epi160809-sup-172961_1_supp_3766818_2hk56m.docx]

Supplementary table 2

Hazard ratios* (HR) and 95% confidence intervals (CI) of cancer in women receiving ART as registered in the Norwegian Prescription Database, stratified by number of cycles of ART.

| Cancer site | ICD 10 Code | Nulliparous | | | Parous | | |
| --- | --- | --- | --- | --- | --- | --- | --- |
|  |  | Cases | HR | 95% CI | Cases | HR | 95% CI |
| Overall Cancer | C00 - 99 |  |  |  |  |  |  |
| 1 cycle |  | 41 | 0.96 | 0.70-1.32 | 120 | 1.09 | 0.91-1.32 |
| 2 cycles |  | 34 | 1.23 | 0.87-1.74 | 77 | 1.21 | 0.96-1.53 |
| 3 or more cycles |  | 33 | 0.89 | 0.62-1.27 | 80 | 1.13 | 0.90-1.43 |
| Total |  | 108 |  |  | 277 |  |  |
| Breast Cancer | C50 |  |  |  |  |  |  |
| 1 cycle |  | 9 | 0.87 | 0.45-1.72 | 38 | 0.99 | 0.71-1.38 |
| 2 cycles |  | 10 | 1.48 | 0.78-2.81 | 23 | 1.03 | 0.68-1.57 |
| 3 or more cycles |  | 10 | 1.11 | 0.58-2.11 | 22 | 0.85 | 0.55-1.31 |
| Total |  | 29 |  |  | 83 |  |  |
| Cervical Cancer | C53 |  |  |  |  |  |  |
| 1 cycle |  | 0 | - |  | 10 | 0.86 | 0.47-1.63 |
| 2 cycles |  | 2 | 0.77 | 0.19-3.19 | 7 | 1.05 | 0.49-1.24 |
| 3 or more cycles |  | 6 | 1.82 | 0.76-4.35 | 7 | 1.00 | 0.47-2.13 |
| Total |  | 8 |  |  | 24 |  |  |
| Endometrial cancer | C54-55 |  |  |  |  |  |  |
| 1 cycle |  | 2 | 0.44 | 0.10-1.83 | 3 | 1.55 | 0.46-5.17 |
| 2 cycles |  | 3 | 0.93 | 0.28-3.07 | 2 | 1.82 | 0.42-7.79 |
| 3 or more cycles |  | 0 | - | - | 2 | 1.58 | 0.36-6.85 |
| Total |  | 5 |  |  | 7 |  |  |
| Ovarian Cancer | C56 |  |  |  |  |  |  |
| 1 cycle |  | 8 | 3.05 | 1.37-6.79 | 1 | 0.38 | 0.05-2.83 |
| 2 cycles |  | 0 | - | - | 3 | 2.02 | 0.61-6.70 |
| 3 or more cycles |  | 3 | 1.18 | 0.35-4.02 | 1 | 0.61 | 0.08-4.44 |
| Total |  | 11 |  |  | 5 |  |  |
| Borderline ovarian tumors | N/A |  |  |  |  |  |  |
| 1 cycle |  | 3 | 1.55 | 0.47-5.10 | 4 | 1.52 | 0.55-4.23 |
| 2 cycles |  | 4 | 3.25 | 1.12-9.38 | 4 | 2.72 | 0.97-7.59 |
| 3 or more cycles |  | 1 | 0.62 | 0.08-4.66 | 4 | 2.59 | 0.92-7.32 |
| Total |  | 8 |  |  | 12 |  |  |
| Thyroid cancer | C73 |  |  |  |  |  |  |
| 1 cycle |  | 3 | 1.60 | 0.50-5.17 | 9 | 1.38 | 0.68-2.76 |
| 2 cycles |  | 4 | 3.39 | 1.20-9.54 | 5 | 1.32 | 0.53-3.28 |
| 3 or more cycles |  | 3 | 1.99 | 0.60-6.59 | 5 | 1.19 | 0.48-2.98 |
| Total |  | 10 |  |  | 19 |  |  |
| Central nervous system | C70-72 |  |  |  |  |  |  |
| 1 cycle |  | 1 | 0.27 | 0.04-1.97 | 8 | 0.98 | 0.48-2.01 |
| 2 cycles |  | 1 | 0.42 | 0.06-3.11 | 6 | 1.74 | 0.85-3.57 |
| 3 or more cycles |  | 2 | 0.63 | 0.15-2.66 | 8 | 1.23 | 0.54-2.82 |
| Total |  | 4 |  |  | 22 |  |  |
| Cutaneous malignant melanoma | C43 |  |  |  |  |  |  |
| 1 cycle |  | 7 | 1.33 | 0.60-2.94 | 14 | 1.02 | 0.59-1.76 |
| 2 cycles |  | 1 | 0.30 | 0.04-2.15 | 7 | 0.96 | 0.42-1.89 |
| 3 or more cycles |  | 2 | 0.45 | 0.11-1.86 | 11 | 1.46 | 0.69-2.35 |
| Total |  | 10 |  |  | 32 |  |  |
| Colorectal | C18-20 |  |  |  |  |  |  |
| 1 cycle |  | 0 | - | - | 7 | 1.13 | 0.52-2.47 |
| 2 cycles |  | 3 | 2.46 | 0.74-8.21 | 3 | 0.84 | 0.26-2.68 |
| 3 or more cycles |  | 0 | - | - | 2 | 0.50 | 0.12-2.04 |
| Total |  | 3 |  |  | 12 |  |  |

*Adjusted for region of residence, birth cohort and concomitant exposure to ART.
