# Supplementary material for: Cancer Risk in Women Treated with Fertility Drugs According to Parity Status—A Registry-based Cohort Study
Source: Oxford University Press journal article supplement (doi:10.1158/1055-9965.epi-16-0809), 2017-01-20
Supplement: 10559965epi160809-sup-172961_1_supp_3766819_lhk56m.docx [file 10559965epi160809-sup-172961_1_supp_3766819_lhk56m.docx]

Supplementary table 1

The following fertility drugs according to the Anatomical Therapeutic Chemical (ATC) classification were included in the analyses of ART and CC exposure

| Drug class | Generic name | ATC code |
| --- | --- | --- |
| GnRH analogues | Nafarelin  Ganirelix  cetrorelix  buserelin  goserelin | H01CA02  H01CC01  H01CC02  L02AE01  L02AE03 |
| Gonadotropins | Menotropin  Urofollitropin  follitropin alfa/r-hFSH  FSH  chorifollitropin alfa  lutropin alfa & follitropin alfa | G03GA02  G03GA04  G03GA05  G03GA06  G03GA09  G03GA30 |
| hCG | Choriongonadotropin  choriongonadotropin alfa | G03GA01  G03GA08 |
| Clomiphene citrate | Clomiphene citrate | G03GB02 |
