# Supplementary material for: Cancer Risk in Women Treated with Fertility Drugs According to Parity Status—A Registry-based Cohort Study
Source: Oxford University Press journal article supplement (doi:10.1158/1055-9965.epi-16-0809), 2017-01-20
Supplement: 10559965epi160809-sup-172961_1_supp_3779229_992991.docx [file 10559965epi160809-sup-172961_1_supp_3779229_992991.docx]

**The following morphology codes were used to classify histologic subtypes of ovarian cancer:**

Serous: 82603 84413 84503 84603 84613

Mucinous: 84703 84713 84803

Endometroid: 83803 83813

Clear cell: 83103

Adenocarcinoma: 81403 82553

Borderline ovarian tumors: 8380/1 8440/1 8442/1 8444/1 8451/1 8462/1 8463/1 8472/1 8473/1 9014/1 9015/1 9000/1
